# Supplementary material for: The Impact of Telemonitoring on Improving Glycemic and Metabolic Control in Previously Lost‐to‐Follow‐Up Patients with Type 2 Diabetes Mellitus: A Single‐Center Interventional Study in the United Arab Emirates
Source: Hindawi journal article supplement (doi:10.1155/2022/6286574), 2022-01-01
Supplement: f1 [file 6286574.f1.pdf]

**Appendix 1. Classes of Medications taken by each patient at the end of the study**

|            |       | Diabetic Medications Class |       |            |      |                         |              |      |                    |   |
|------------|-------|----------------------------|-------|------------|------|-------------------------|--------------|------|--------------------|---|
|            |       | Insulin                    | SGLT2 | Biguanides | DPP4 | Insulin<br>secretagogue | sulfonylurea | GLP1 | Thiazolidinediones |   |
| Patient No | 1.00  | 0                          | X     | X          | X    | X                       | 0            | 0    | 0                  | 0 |
|            | 2.00  | 0                          | X     | X          | X    | 0                       | X            | 0    | 0                  | 0 |
|            | 3.00  | 0                          | X     | X          | X    | X                       | 0            | 0    | 0                  | 0 |
|            | 4.00  | 0                          | X     | X          | 0    | X                       | 0            | 0    | 0                  | 0 |
|            | 5.00  | 0                          | X     | X          | X    | X                       | 0            | 0    | 0                  | X |
|            | 6.00  | 0                          | 0     | X          | X    | 0                       | 0            | 0    | 0                  | 0 |
|            | 7.00  | 0                          | X     | X          | X    | X                       | 0            | 0    | 0                  | X |
|            | 8.00  | 0                          | 0     | X          | X    | X                       | 0            | 0    | 0                  | 0 |
|            | 9.00  | 0                          | X     | 0          | X    | 0                       | 0            | 0    | 0                  | 0 |
|            | 10.00 | X                          | X     | X          | X    | X                       | 0            | X    | 0                  | 0 |
|            | 11.00 | 0                          | X     | X          | X    | X                       | 0            | X    | 0                  | 0 |
|            | 12.00 | 0                          | X     | X          | X    | 0                       | 0            | 0    | 0                  | 0 |
|            | 13.00 | 0                          | X     | 0          | 0    | X                       | 0            | 0    | 0                  | 0 |
|            | 14.00 | X                          | X     | X          | 0    | 0                       | 0            | X    | 0                  | 0 |
|            | 15.00 | 0                          | 0     | X          | 0    | X                       | 0            | 0    | 0                  | 0 |
|            | 16.00 | 0                          | X     | X          | X    | X                       | 0            | 0    | 0                  | 0 |
|            | 17.00 | 0                          | 0     | X          | X    | 0                       | 0            | X    | 0                  | 0 |
|            | 18.00 | X                          | 0     | X          | X    | 0                       | 0            | X    | 0                  | 0 |
|            | 19.00 | X                          | X     | X          | 0    | X                       | X            | 0    | 0                  | 0 |

|       |   |   |   |   |   |   |   |   |
|-------|---|---|---|---|---|---|---|---|
| 20.00 | X | X | X | 0 | 0 | 0 | X | 0 |
| 21.00 | 0 | X | X | X | 0 | X | 0 | 0 |
| 22.00 | 0 | X | X | X | 0 | 0 | 0 | 0 |
| 23.00 | 0 | X | X | X | X | 0 | 0 | 0 |
| 24.00 | 0 | X | X | X | 0 | 0 | 0 | 0 |
| 25.00 | 0 | 0 | X | X | X | 0 | 0 | 0 |
| 26.00 | X | X | X | X | X | 0 | 0 | 0 |
| 27.00 | X | X | X | X | 0 | 0 | X | 0 |
| 28.00 | 0 | X | X | X | X | 0 | 0 | 0 |
| 29.00 | 0 | X | X | X | 0 | X | 0 | 0 |
| 30.00 | 0 | X | X | X | X | 0 | 0 | 0 |
| 31.00 | 0 | X | 0 | X | X | 0 | X | 0 |
| 32.00 | 0 | X | 0 | X | 0 | 0 | 0 | 0 |
| 33.00 | 0 | 0 | X | X | 0 | 0 | 0 | 0 |
| 34.00 | X | 0 | X | 0 | X | 0 | X | 0 |
| 35.00 | X | X | X | 0 | X | 0 | X | 0 |
| 36.00 | 0 | X | X | 0 | X | X | 0 | 0 |
| 37.00 | X | X | X | 0 | X | 0 | X | 0 |
| 38.00 | X | X | X | X | 0 | 0 | X | X |

**X: Patient taking the medication**

**0: Patient not taking the medication**
